# Supplementary material for: New conformationally flexible and recyclable aryl iodine catalysts from inexpensive chiral source for asymmetric oxidations
Source: Research Square preprint supplement (doi:10.21203/rs.3.rs-2746569/v1), 2023-04-24

---

The following ALERTS were generated. Each ALERT has the format

**test-name\_ALERT\_alert-type\_alert-level.**

Click on the hyperlinks for more details of the test.

---

● **Alert level C**

|                   |                                                  |                         |              |
|-------------------|--------------------------------------------------|-------------------------|--------------|
| PLAT041_ALERT_1_C | Calc. and Reported SumFormula                    | Strings Differ          | Please Check |
| PLAT068_ALERT_1_C | Reported F000 Differs from Calcd (or Missing)... |                         | Please Check |
| PLAT220_ALERT_2_C | NonSolvent Resd 1 C                              | Ueq(max)/Ueq(min) Range | 3.5 Ratio    |
| PLAT234_ALERT_4_C | Large Hirshfeld Difference C17                   | --C18                   | 0.17 Ang.    |
| PLAT241_ALERT_2_C | High 'MainMol' Ueq as Compared to Neighbors of   |                         | C16 Check    |
| PLAT241_ALERT_2_C | High 'MainMol' Ueq as Compared to Neighbors of   |                         | C18 Check    |
| PLAT241_ALERT_2_C | High 'MainMol' Ueq as Compared to Neighbors of   |                         | C24 Check    |
| PLAT241_ALERT_2_C | High 'MainMol' Ueq as Compared to Neighbors of   |                         | C47 Check    |
| PLAT242_ALERT_2_C | Low 'MainMol' Ueq as Compared to Neighbors of    |                         | C10 Check    |
| PLAT242_ALERT_2_C | Low 'MainMol' Ueq as Compared to Neighbors of    |                         | C14 Check    |
| PLAT242_ALERT_2_C | Low 'MainMol' Ueq as Compared to Neighbors of    |                         | C35 Check    |
| PLAT342_ALERT_3_C | Low Bond Precision on C-C Bonds .....            |                         | 0.00868 Ang. |
| PLAT415_ALERT_2_C | Short Inter D-H..H-X                             | H1B ..H36C              | 2.05 Ang.    |
|                   |                                                  | x,y,1+z =               | 1_556 Check  |
| PLAT420_ALERT_2_C | D-H Bond Without Acceptor N1                     | --H1A                   | Please Check |
| PLAT420_ALERT_2_C | D-H Bond Without Acceptor N1                     | --H1B                   | Please Check |
| PLAT420_ALERT_2_C | D-H Bond Without Acceptor N3                     | --H3A                   | Please Check |
| PLAT420_ALERT_2_C | D-H Bond Without Acceptor N3                     | --H3B                   | Please Check |
| PLAT934_ALERT_3_C | Number of (Iobs-Icalc)/Sigma(W) > 10 Outliers .. |                         | 1 Check      |
| PLAT975_ALERT_2_C | Check Calcd Resid. Dens. 1.08Ang From C7         |                         | 0.52 eA-3    |

---

● **Alert level G**

FORMU01\_ALERT\_1\_G There is a discrepancy between the atom counts in the  
\_chemical\_formula\_sum and \_chemical\_formula\_moiety. This is  
usually due to the moiety formula being in the wrong format.  
Atom count from \_chemical\_formula\_sum: C56 H61 I1 N4 O8 Si2  
Atom count from \_chemical\_formula\_moiety:C56 H60 I1 N4 O8 Si2

FORMU01\_ALERT\_2\_G There is a discrepancy between the atom counts in the  
\_chemical\_formula\_sum and the formula from the \_atom\_site\* data.  
Atom count from \_chemical\_formula\_sum:C56 H61 I1 N4 O8 Si2  
Atom count from the \_atom\_site data: C56 H60 I1 N4 O8 Si2

CELLZ01\_ALERT\_1\_G Difference between formula and atom\_site contents detected.

CELLZ01\_ALERT\_1\_G WARNING: H atoms missing from atom site list. Is this intentional?  
From the CIF: \_cell\_formula\_units\_Z 4  
From the CIF: \_chemical\_formula\_sum C56 H61 I N4 O8 Si2  
TEST: Compare cell contents of formula and atom\_site data

| atom | Z*formula | cif sites | diff |
|------|-----------|-----------|------|
| C    | 224.00    | 224.00    | 0.00 |
| H    | 244.00    | 240.00    | 4.00 |
| I    | 4.00      | 4.00      | 0.00 |
| N    | 16.00     | 16.00     | 0.00 |
| O    | 32.00     | 32.00     | 0.00 |
| Si   | 8.00      | 8.00      | 0.00 |

|                   |                                                  |           |
|-------------------|--------------------------------------------------|-----------|
| PLAT002_ALERT_2_G | Number of Distance or Angle Restraints on AtSite | 40 Note   |
| PLAT003_ALERT_2_G | Number of Uiso or Uij Restrained non-H Atoms ... | 39 Report |
| PLAT007_ALERT_5_G | Number of Unrefined Donor-H Atoms .....          | 4 Report  |
| PLAT172_ALERT_4_G | The CIF-Embedded .res File Contains DFIX Records | 1 Report  |
| PLAT176_ALERT_4_G | The CIF-Embedded .res File Contains SADI Records | 44 Report |



24 ALERT type 2 Indicator that the structure model may be wrong or deficient  
32 ALERT type 3 Indicator that the structure quality may be low  
9 ALERT type 4 Improvement, methodology, query or suggestion  
2 ALERT type 5 Informative message, check

---

---

It is advisable to attempt to resolve as many as possible of the alerts in all categories. Often the minor alerts point to easily fixed oversights, errors and omissions in your CIF or refinement strategy, so attention to these fine details can be worthwhile. In order to resolve some of the more serious problems it may be necessary to carry out additional measurements or structure refinements. However, the purpose of your study may justify the reported deviations and the more serious of these should normally be commented upon in the discussion or experimental section of a paper or in the "special\_details" fields of the CIF. checkCIF was carefully designed to identify outliers and unusual parameters, but every test has its limitations and alerts that are not important in a particular case may appear. Conversely, the absence of alerts does not guarantee there are no aspects of the results needing attention. It is up to the individual to critically assess their own results and, if necessary, seek expert advice.

#### **Publication of your CIF in IUCr journals**

A basic structural check has been run on your CIF. These basic checks will be run on all CIFs submitted for publication in IUCr journals (*Acta Crystallographica*, *Journal of Applied Crystallography*, *Journal of Synchrotron Radiation*); however, if you intend to submit to *Acta Crystallographica Section C* or *E* or *IUCrData*, you should make sure that full publication checks are run on the final version of your CIF prior to submission.

#### **Publication of your CIF in other journals**

Please refer to the *Notes for Authors* of the relevant journal for any special instructions relating to CIF submission.

---

**PLATON version of 28/11/2022; check.def file version of 28/11/2022**

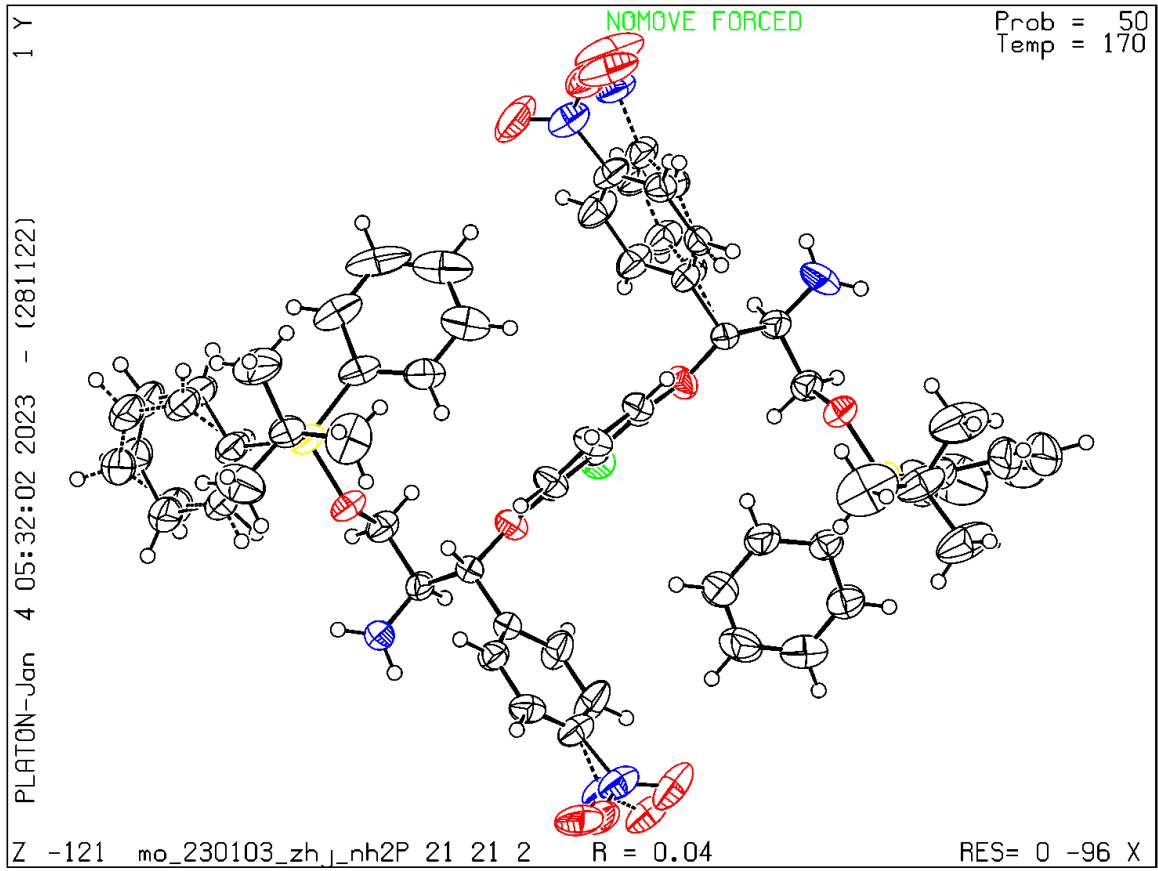

Supplement: Supplementary file 1 [file 1d0f2a2d9113b6262cb4f1ec.pdf]
