# Supplementary material for: New conformationally flexible and recyclable aryl iodine catalysts from inexpensive chiral source for asymmetric oxidations
Source: Research Square preprint supplement (doi:10.21203/rs.3.rs-2746569/v1), 2023-04-24
Supplement: Supplementary file 2 [file 825fa8a7360db60cce93300c.docx]

**Table 1. Optimization of the enantioselective oxidative dearomatizationa,b,c**

a12 (0.2 mmol, 1.0 equiv.), Cat (0.03 mmol, 15 mol%), *m*CPBA (0.3 mmol, 1.5 equiv.) were stirred in CH2Cl2 (10 mL) at -30 to 0 oC for 24 h. bIsolated yield. cThe *ee* value was determined by chiral HPLC. dEtOH (1 mmol, 5 equiv.) was added. eCat-8 (0.02 mmol, 10 mol%) was added. fCat-8 (0.01 mmol, 5 mol%) was added. gCH2Cl2 (5 mL), and EtOH (1 mmol, 5 equiv.) were added.

**Table 2. Applications of the new aryl iodine catalyst in** **oxidative dearomatization.a,b,c**

a12 (0.2 mmol, 1.0 equiv.), Cat-8 (0.03 mmol, 15 mol%), *m*CPBA (0.3 mmol, 1.5 equiv.), and EtOH (1 mmol, 5 equiv.) were stirred in CH2Cl2 (10 mL) at -20 oC for 24 h. bIsolated yield. cThe *ee* value was determined by chiral HPLC. d12 (7 mmol, 1.0 equiv.), Cat-8 (0.35 mmol, 5 mol%), *m*CPBA (8.3 mmol, 1.2 equiv.), and EtOH (35 mmol, 5 equiv.) were stirred in CH2Cl2 (100 mL) at -20 oC for 48 h; the *ee* value and yield were determined after recrystallization. eWithout EtOH. fStirred at 0 oC. gStirred at 0 oC for 80 h. h12 (0.2 mmol, 1.0 equiv.), Cat-8 (0.03 mmol, 15 mol%), *m*CPBA (0.3 mmol, 1.5 equiv.), and HFIP (10 mmol, 50 equiv.) were stirred in CH2Cl2 (10 mL) at -20 oC for 24 h. iStirred for 16 h. jCat-24 was used. kCat-22 was used. lReported by the ref [49]. mReported by the ref [54]. nReported by the ref [40]. oReported by the ref [68].

**Table 3. Applications of the aryl iodine catalyst library to the oxidative spirolactonization** **and direct C(sp2)−H/C(sp3)−H cross-coupling.**

a15 (0.2 mmol, 1.0 equiv.), Cat-9 (0.03 mmol, 15 mol%), *m*CPBA (0.26 mmol, 1.3 equiv.), TFE (10 mmol, 50 equiv.), and H2O (2 mmol, 10 equiv.) were stirred in MeNO2 (3 mL) at -10 oC for 72 h. bIsolated yield. cThe *ee* value was determined by chiral HPLC. d17 (0.2 mmol, 1.0 equiv.), Cat-3 (0.03 mmol, 15 mol%), *m*CPBA (0.52 mmol, 2.6 equiv.), TFA (0.6 mmol, 3 equiv.), and H2O (0.6 mmol, 3 equiv.) were stirred in MeCN (3 mL) at 25 oC for 16 h. eReported by the ref [69]. fReported by the ref [22].

**Table 4. Application of the aryl iodine catalyst library to the** **oxidative fluorination of keto esters.a,b,c**

a19 (0.2 mmol, 1.0 equiv.), Cat-38 (0.03 mmol, 15 mol%), *m*CPBA (0.3 mmol, 1.5 equiv.), and Et3N·3HF (3 mmol, 10 equiv.) were stirred in CHCl3 (8 mL) at 25 oC for 24 h. bIsolated yield. cThe *ee* value was determined by chiral HPLC. d48 h. e72 h.

**Table 5. Catalyst recovery and recycling experiments in the oxidative dearomatization.a,b,c,d,e**

a**12a** (3 mmol**,** 1.0 equiv.), **Cat-8** (0.3 mmol, 10 mol%), *m*CPBA (3.6 mmol, 1.2 equiv.), and EtOH (15 mmol, 5 equiv.) were stirred in CH2Cl2 (43 mL) at -20 oC for 24 h. bIsolated yield. cThe *ee* value was determined by chiral HPLC. dCatalyst was precipitated by the mixture of MeOH (30 mL) and H2O (10 mL). eProduct was recrystallized by the mixture (10 mL, 1:300 volume ratio) of ethyl acetate and petroleum ether.

**Table 6. The significance for the H-bond interaction and tunable chiral pocket.**
